# Supplementary material
Source: PubMed Central journal article supplement (PMC2729444)
Supplement: NIHMS103383-supplement-1_si_001.pdf [file NIHMS103383-supplement-1_si_001.pdf]

## Supporting Information.

# Label-Free DNA Sensor Based on Surface Charge Modulated Ionic Conductance.

*Xian Wang and Sergei Smirnov\**

Department of Chemistry and Biochemistry, New Mexico State University, Las Cruces,  
NM 88003

E-mail: [snsn@nmsu.edu](mailto:snsn@nmsu.edu)

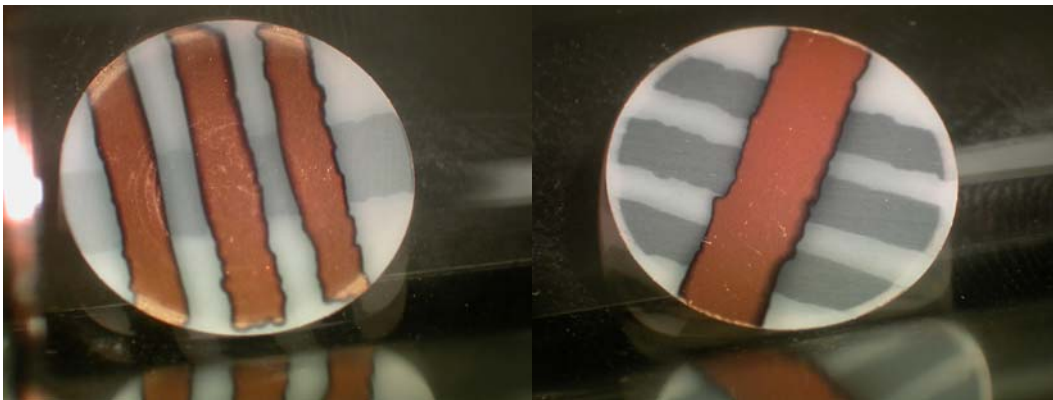

**Figure A.** Two sides of the membrane with deposited gold electrodes before assembly.

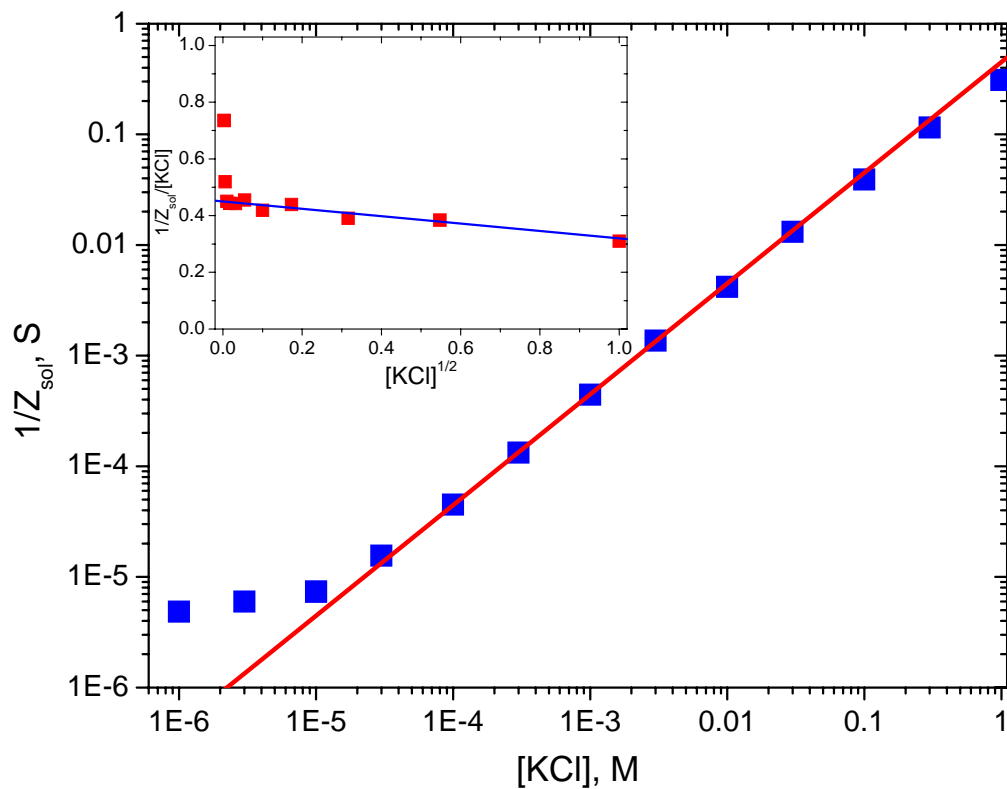

**Figure B.** Concentration dependence of the conductance for solutions of different  $[KCl]$  concentrations in air saturated DI water measured in a platinum electrodes cell with the cell constant of 0.3. The insert shows Kohlrausch plot of  $|Z_{mem}[KCl]|^{-1}$  vs  $[KCl]^{1/2}$

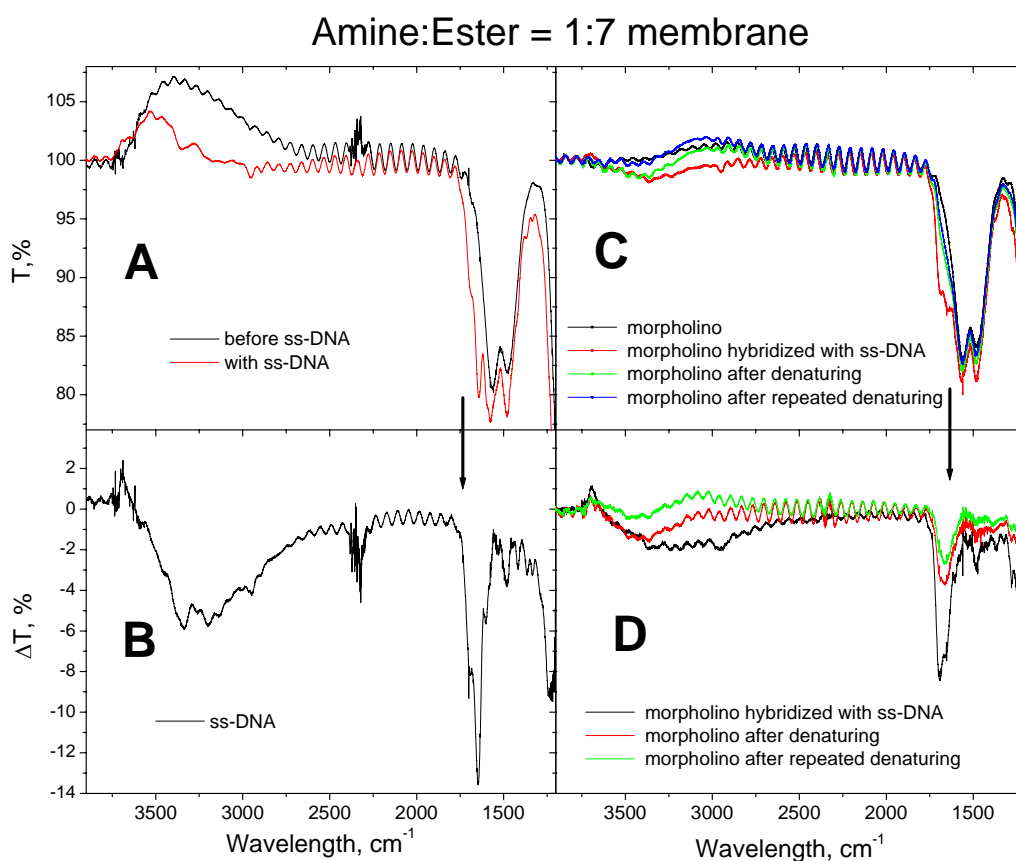

**Figure C.** FTIR spectra of membranes modified with 1:7 ratio of amine:ester and activated with glutaraldehyde. Different stages of manipulation with DNA and morpholino are shown: **A.** Activated by glutaraldehyde (before) and after immobilization of aminated ss-DNA. The difference between the two, shown in **B**, exemplifies the net effect of DNA. **C.** The morpholino signal is weak and overlaps with that of ester and Schiff base near  $1600 \text{ cm}^{-1}$  so that it is barely recognizable. The hybridized target ss-DNA has a blue shifted peak near  $1650 \text{ cm}^{-1}$  and is better viewed when the morpholino spectrum is subtracted (**D**). Its amplitude is smaller than with covalently attached DNA (**B**) and denaturing in urea does not appear to fully eliminate it even after two cycles of 2 hour treatment.

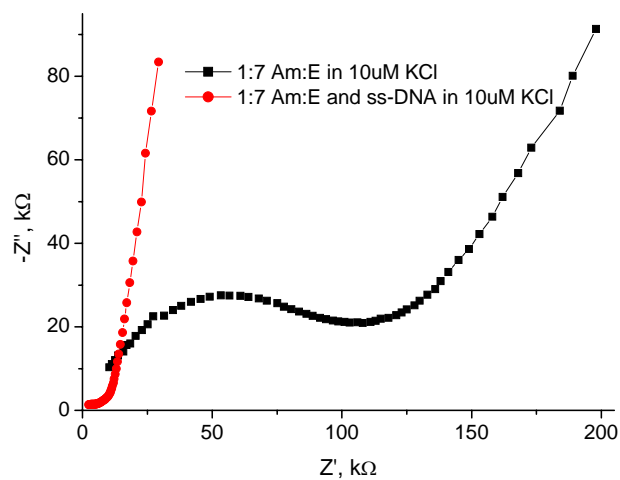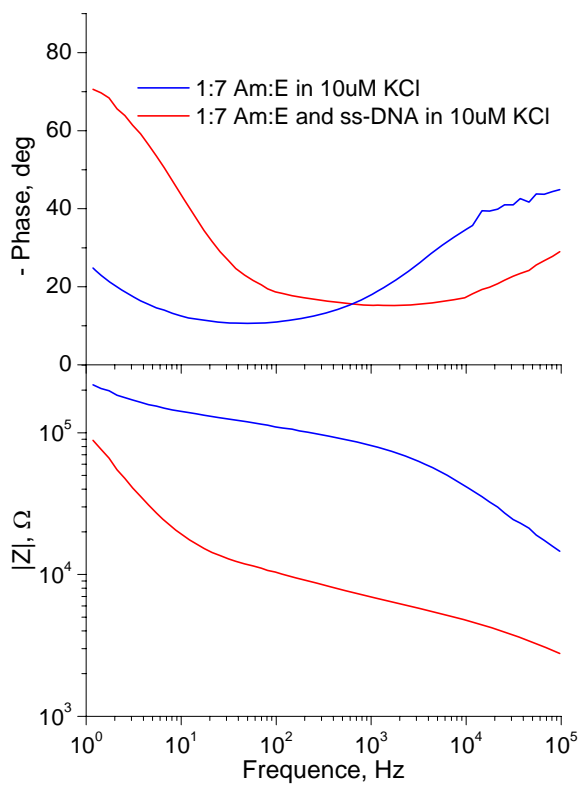

**Figure D.** The Nyquist and the full Bode plots (with phase) for the membranes with optimized Amine:Ester = 1:7 ratio before and after attachment of ss-DNA. Measurements were performed in 10  $\mu$ M KCl.

**Table A.** Variation of the electrode resistance for different thicknesses of deposited gold.

| Time of Au layer deposition | $R_1, \Omega$ | $R_2, \Omega$    |
|-----------------------------|---------------|------------------|
| 3 nm Cr + 77 nm Au at 7.5°  | 110           | $>2 \times 10^6$ |
| 3 nm Cr + 77 nm Au at 15°   | 80            | $>2 \times 10^6$ |
| 3 nm Cr + 77 nm Au at 20°   | 65            | $>2 \times 10^6$ |
| 3 nm Cr + 147 nm Au at 15°  | 22            | 150              |
| 3 nm Cr + 197 nm Au at 15°  | 21            | 25               |
